# Supplementary material
Source: publisher figshare collection journal article supplement (https://rs.figshare.com/ndownloader/files/17842745)
Supplement: Supplementary file 1 [file 17842745]

50	0.01	0.2	-1	1	0.03	0.04	0.4	0	5	1	291.33	0.01491
50	0.4	0.5	-1	1	0.03	0.04	0.4	0.1	5	1	273.4	0.00632
50	0.99	0.7	-1	1	0.03	0.04	0.4	0.2	5	1	520.47	0.00479
50	0.99	0.8	-1	1	0.03	0.04	0.4	0.3	5	1	806.57	0.00805
50	0.99	0.9	-1	1	0.03	0.04	0.4	0.4	5	1	1693.5	0.01568
50	0.99	0.9	-1	1	0.03	0.04	0.4	0.5	5	1	1746.1	0.01935
50	0.99	0.9	-1	1	0.03	0.04	0.4	0.6	5	1	1757.8	0.02248
50	0.99	0.99	-1	1	0.03	0.04	0.4	0.7	5	1	12841	0.04356
50	0.99	0.99	-1	1	0.03	0.04	0.4	0.8	5	1	12809	0.04305
50	0.99	0.99	-1	1	0.03	0.04	0.4	0.9	5	1	12725	0.04317
